# Supplementary material for: circRNA_141539 can serve as an oncogenic factor in esophageal squamous cell carcinoma by sponging miR-4469 and activating CDK3 gene
Source: PubMed Central journal article supplement (PMC8109109; doi:10.18632/aging.103071), 2021-01-27
Supplement: aging-13-103071-s001.pdf [file aging-13-103071-s001.pdf]

SUPPLEMENTARY FIGURES

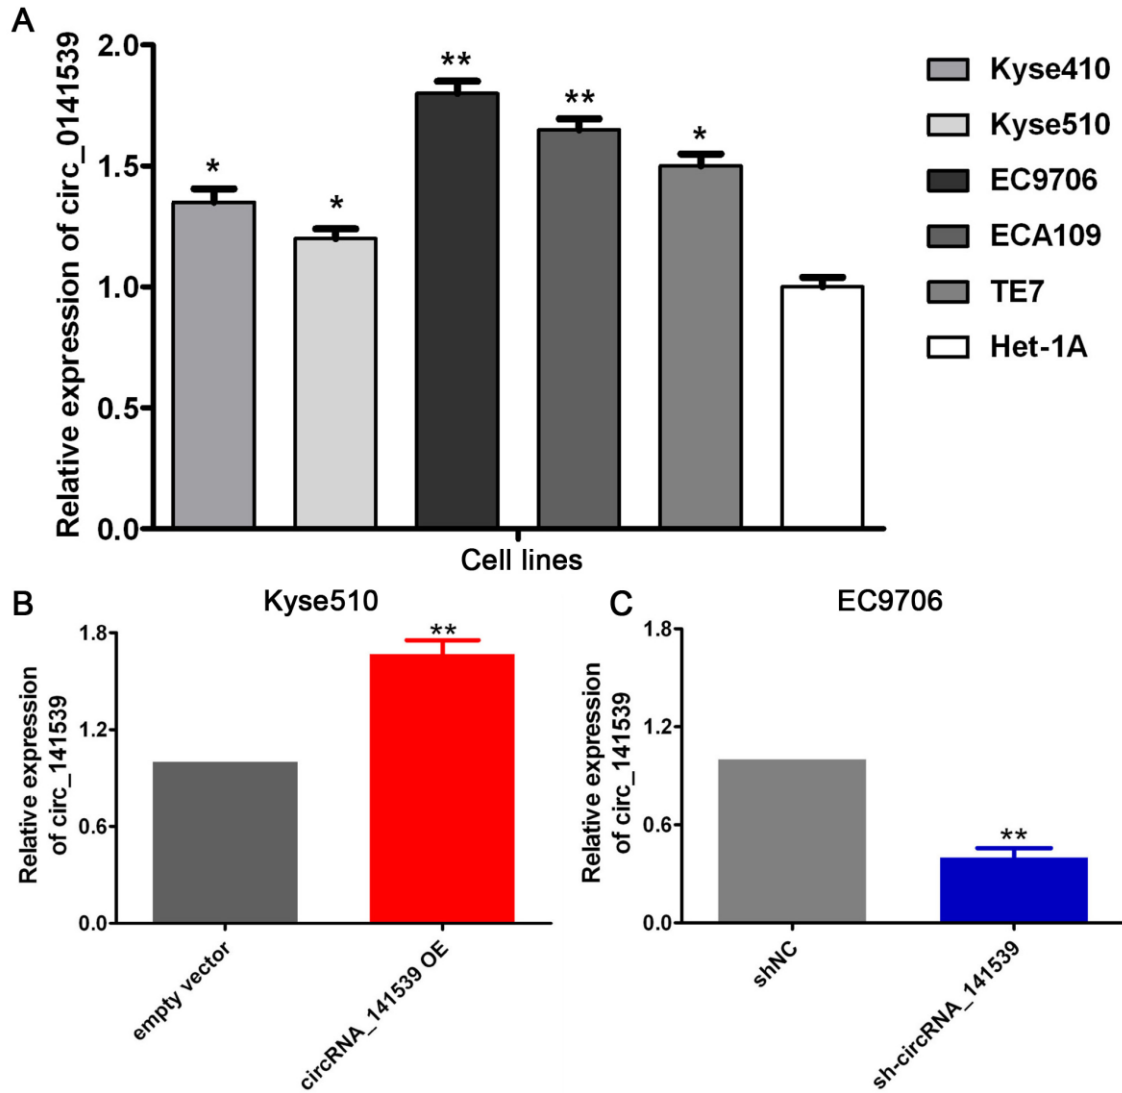

**Supplementary Figure 1. circRNA\_141539 was up-regulated in ESCC cells and cell transfection.** (A) qRT-PCR assay showed that circRNA\_001937 was significantly up-regulated in ESCC cells, \* $P < 0.05$ , \*\* $P < 0.01$  versus Het-1A cells. (B, C) Transfection efficiency were verified by qRT-PCR. \* $P < 0.05$ , \*\* $P < 0.01$  versus corresponding NC group.

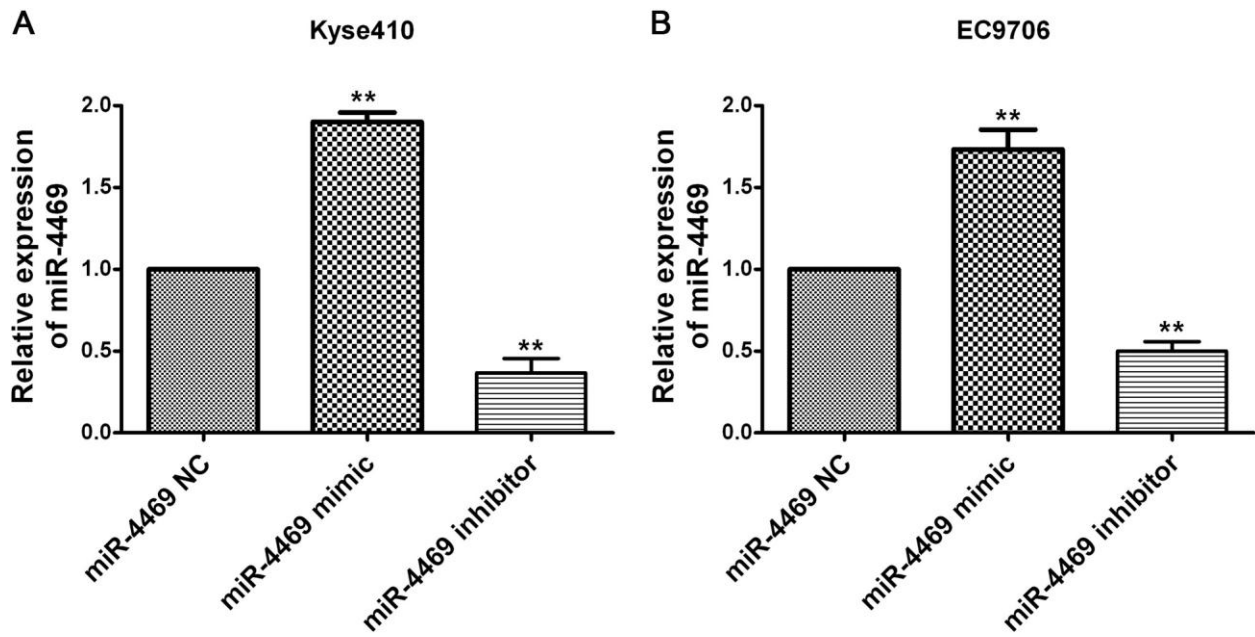

**Supplementary Figure 2. Transfection efficiency of miR-4469 as determined via reverse transcription-quantitative PCR.** (A) Kyse510 cells, (B) EC9706 cells. \* $P < 0.05$ , \*\* $P < 0.01$  versus corresponding NC group.
