# Supplementary material for: circRNA_141539 can serve as an oncogenic factor in esophageal squamous cell carcinoma by sponging miR-4469 and activating CDK3 gene
Source: publisher site journal article supplement (doi:10.18632/aging.103071), 2021-01-27
Supplement: Supplementary file [file aging-v13i8-103071-supplementary-material-SD2.pdf]

## SUPPLEMENTARY TABLES

**Supplementary Table 1. The top 10 significantly up/down -regulated circRNAs.**

| circRNA            | P-value | FC      | Regulation | Source   | Chrom | Type        | GeneSymbol |
|--------------------|---------|---------|------------|----------|-------|-------------|------------|
| hsa_circRNA_035855 | 0.03615 | 7.64374 | up         | circBase | chr15 | exonic      | PIF1       |
| hsa_circRNA_400075 | 0.01663 | 7.60343 | up         | circBase | chr3  | intronic    | RPL29      |
| hsa_circRNA_141539 | 0.02044 | 7.58017 | up         | 25070500 | chr6  | intronic    | C6orf106   |
| hsa_circRNA_101337 | 0.00195 | 6.93262 | up         | circBase | chr14 | exonic      | HEATR5A    |
| hsa_circRNA_100882 | 0.04987 | 6.12234 | up         | circBase | chr11 | exonic      | STARD10    |
| hsa_circRNA_031267 | 0.00767 | 5.91116 | up         | circBase | chr14 | exonic      | PSMB5      |
| hsa_circRNA_407088 | 0.04430 | 5.20779 | up         | 25070500 | chr8  | exonic      | EYA1       |
| hsa_circRNA_051241 | 0.02310 | 4.90222 | up         | circBase | chr19 | exonic      | RPS19      |
| hsa_circRNA_016458 | 0.02619 | 4.89278 | up         | circBase | chr1  | exonic      | KCNK2      |
| hsa_circRNA_008410 | 0.03107 | 4.59272 | up         | circBase | chr17 | intronic    | PGS1       |
| hsa_circRNA_405241 | 0.01602 | 9.10119 | down       | 25070500 | chr14 | exonic      | PPM1A      |
| hsa_circRNA_091722 | 0.03101 | 9.09461 | down       | circBase | chrX  | exonic      | MAGEA3     |
| hsa_circRNA_404987 | 0.01651 | 8.79459 | down       | 25070500 | chr12 | overlapping | ERGIC2     |
| hsa_circRNA_100696 | 0.03132 | 8.08075 | down       | circBase | chr10 | exonic      | PPAPDC1A   |
| hsa_circRNA_001015 | 0.04874 | 7.97024 | down       | circBase | chr2  | intronic    | USP34      |
| hsa_circRNA_406058 | 0.02140 | 7.06160 | down       | 25070500 | chr2  | intronic    | RNU2-22P   |
| hsa_circRNA_003613 | 0.03224 | 6.83637 | down       | circBase | chr1  | exonic      | NRD1       |
| hsa_circRNA_089652 | 0.02254 | 6.12656 | down       | circBase | chr9  | exonic      | TPRN       |
| hsa_circRNA_100899 | 0.02291 | 5.81777 | down       | circBase | chr11 | exonic      | INTS4      |
| hsa_circRNA_102832 | 0.04090 | 5.61607 | down       | circBase | chr2  | exonic      | ARL6IP6    |

FC, fold change.

**Supplementary Table 2. Patients' clinicopathologic characteristics.**

| Characteristics         | Cases (n) |
|-------------------------|-----------|
| Median age (years)      | 68 y      |
| Gender                  |           |
| Male                    | 35        |
| Female                  | 15        |
| Pathological types      |           |
| Adenocarcinoma          | 0         |
| Squamous cell carcinoma | 50        |
| TNM stage               |           |
| I/II                    | 12        |
| III                     | 38        |
| Pathological stage      |           |
| High and middle         | 19        |
| Low                     | 21        |
